# Supplementary material for: Recent endemic coronavirus infection is associated with less-severe COVID-19
Source: JCI journal article supplement (doi:10.1172/jci143380), 2020-09-30
Supplement: sd1 [file 1]

**Supplemental Table 1. Demographics of the patients hospitalized for COVID-19 with and without a previously documented endemic coronavirus<sup>a</sup>**

|                                              | <b>eCoV-<br/>(n = 231)</b> | <b>eCoV+<br/>(n = 21)</b> | <b>p-value</b>    |
|----------------------------------------------|----------------------------|---------------------------|-------------------|
| <b>Age, median (IQR)</b>                     | 64 (52 – 72)               | 58 (51 – 77)              | 0.70 <sup>b</sup> |
| <b>Male</b>                                  | 128 (55.4)                 | 15 (71.4)                 | 0.17              |
| <b>Race / Ethnicity</b>                      |                            |                           | 0.43 <sup>c</sup> |
| <b>Black</b>                                 | 123 (53.2)                 | 11 (52.4)                 |                   |
| <b>White</b>                                 | 55 (23.8)                  | 5 (23.8)                  |                   |
| <b>Hispanic/Latin</b>                        | 51 (22.1)                  | 3 (14.3)                  |                   |
| <b>Body mass index, median (IQR)</b>         | 28.9 (24.4 – 34.2)         | 25.4 (22.1 – 31.8)        | 0.08 <sup>b</sup> |
| <b>Diabetes mellitus</b>                     | 114 (49.3)                 | 3 (14.3)                  | 0.002             |
| <b>Hypertension</b>                          | 180 (77.9)                 | 16 (76.2)                 | 0.79              |
| <b>Coronary artery disease</b>               | 41 (17.8)                  | 5 (23.8)                  | 0.55              |
| <b>Congestive heart failure</b>              | 44 (19.0)                  | 2 (9.5)                   | 0.38              |
| <b>Chronic obstructive pulmonary disease</b> | 56 (24.2)                  | 5 (23.8)                  | 1.00              |
| <b>Asthma</b>                                | 61 (26.4)                  | 6 (28.6)                  | 0.80              |
| <b>Renal disease</b>                         | 56 (24.2)                  | 4 (19.0)                  | 0.79              |
| <b>Human immunodeficiency virus</b>          | 13 (5.6)                   | 1 (4.8)                   | 1.00              |
| <b>Cancer</b>                                | 33 (14.3)                  | 1 (4.8)                   | 0.33              |
| <b>End stage renal disease</b>               | 26 (11.2)                  | 2 (9.5)                   | 1.00              |
| <b>Number of co-morbidities</b>              |                            |                           | 0.71 <sup>c</sup> |
| <b>0</b>                                     | 30 (13.0)                  | 4 (19.0)                  |                   |
| <b>1</b>                                     | 1 (0.4)                    | 0 (0.0)                   |                   |
| <b>≥2</b>                                    | 200 (86.6)                 | 17 (81.0)                 |                   |

Abbreviations include eCoV: endemic coronavirus; IQR: interquartile range; SARS-CoV-2: Severe Acute Respiratory Syndrome Coronavirus 2; COVID-19: coronavirus disease-2019. Race and diagnoses are based on patient supplied information and the most current problem list in the medical record respectively.

<sup>a</sup> Data are expressed as number (%) and p-value was calculated using Fisher's exact test unless otherwise indicated.

<sup>b</sup> Mann Whitney U test

<sup>c</sup> Chi Square Test

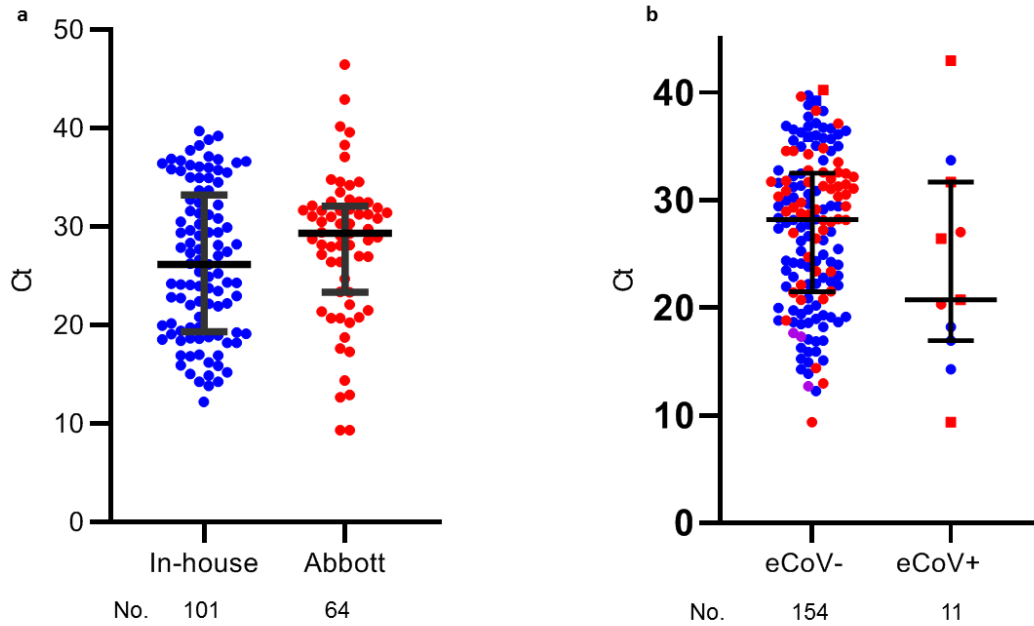

**Supplemental Figure 1. SARS-CoV-2 quantitative RT-PCR Ct values.** The quantitative cycle threshold ( $C_t$ ) in the initial or only positive SARS-CoV-2 RT-PCR obtained using the different platforms (a) and among the eCoV- and eCoV+ patients (b). The blue and red symbols are  $C_t$  values obtained from an in-house and commercial quantitative SARS-CoV-2 RT-PCR test (Abbott Laboratories) respectively. The Abbott assay gene target is proprietary. The in-house assay targets the SARS-CoV-2 nucleocapsid gene. The number of patients (No.) contributing to the data are denoted below the x-axis. The black lines in the dot plots represent the median and interquartile range. Comparisons were done using Mann-Whitney U test.

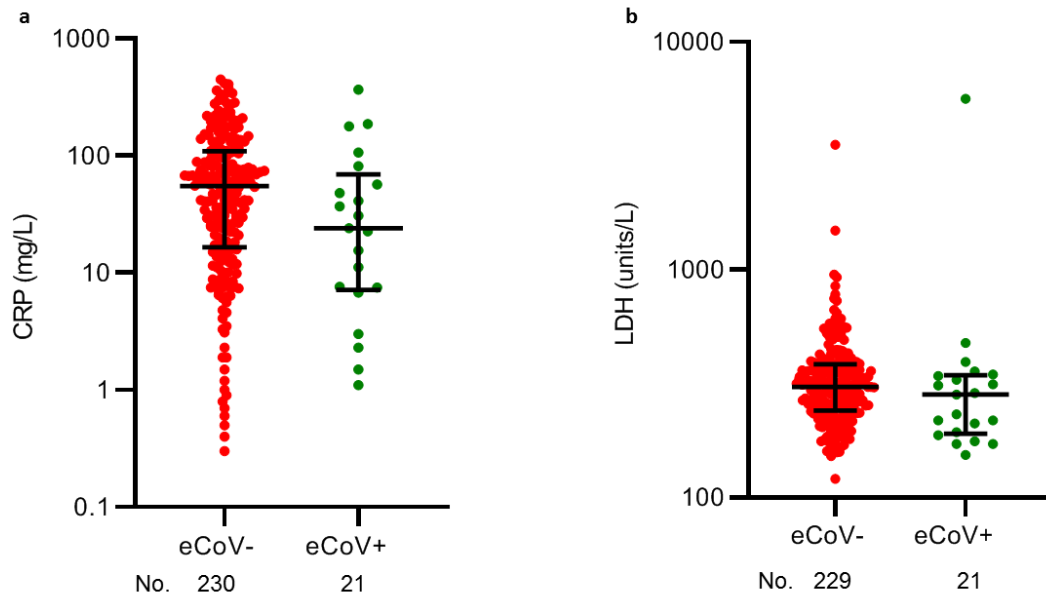

**Supplemental Figure 2. Plasma inflammatory markers among COVID-19 hospitalized patients with and without a documented endemic coronavirus.** C-reactive protein (CRP) (A) and lactate dehydrogenase (LDH) (C) values among SARS-CoV-2 positive eCoV- and eCoV+ hospitalized patients. The eCoV- and eCoV+ group and the number of patients (No.) contributing to the data are denoted below the x-axis. The black lines in the dot plots represent the median and interquartile range. Comparisons were done using Mann-Whitney U test.
